# Supplementary material for: Long noncoding RNA expression profile and association with SLEDAI score in monocyte-derived dendritic cells from patients with systematic lupus erythematosus
Source: Springer Nature journal article supplement (doi:10.1186/s13075-018-1640-x), 2018-07-11

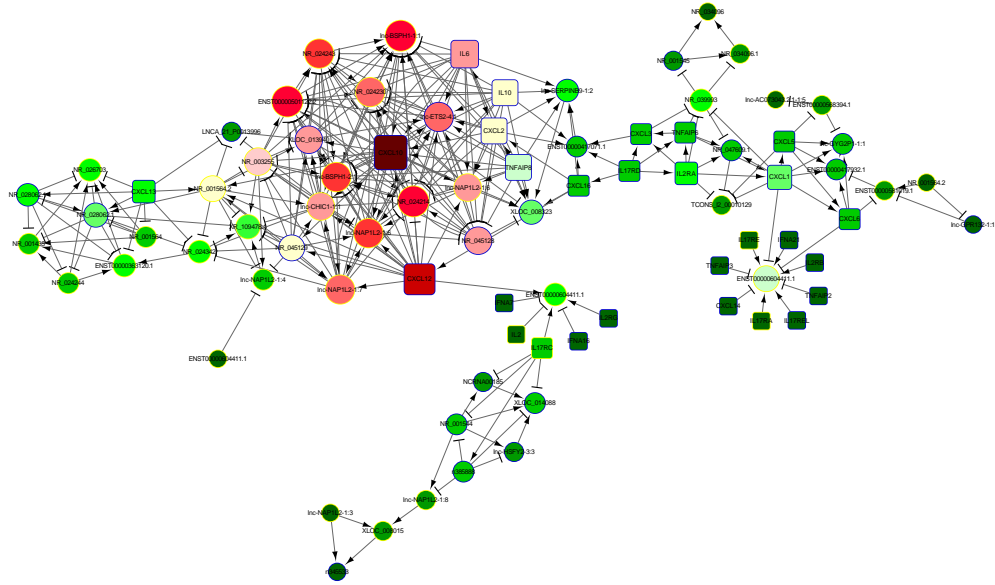

Supplement: MOESM6 [file 15945738]
